# Supplementary material
Source: Copernicus journal article supplement (doi:10.5194/acp-26-7985-2026)
Supplement: Supplementary file 1 [file acp-26-7985-2026-supplement.pdf]

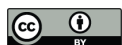

*Supplement of*

## **Impact of future aircraft $\text{NO}_x$ emissions on atmospheric composition and climate: dependence on background conditions**

**Zosia Staniaszek et al.**

*Correspondence to:* Zosia Staniaszek ([zosia.staniaszek@cicero.oslo.no](mailto:zosia.staniaszek@cicero.oslo.no))

The copyright of individual parts of the supplement might differ from the article licence.

**Table S1: NOx emissions (TgNO2 yr-1) used in the different scenarios, for background and aviation. Corresponds to Table 2 in the main text but with emissions quantified.**

| <b>Label</b>       | <b>Background<br/>NOx emissions</b> | <b>Aviation<br/>NOx Emissions</b> | <b>Description</b>                    |
|--------------------|-------------------------------------|-----------------------------------|---------------------------------------|
| REF_PD             | 152.37                              | 3.78                              | Present Day (PD)                      |
| PD_Air-20          | 152.37                              | 3.02                              | PD - 20% aviation NOx emissions       |
| REF_SSP1           | 71.61                               | 2.86                              | SSP1 baseline                         |
| SSP1_Air-20        | 71.61                               | 2.29                              | SSP1 - 20% aviation NOx emissions     |
| REF_SSP3BG_SSP1Air | 164.04                              | 2.86                              | SSP1 baseline with SSP3 background    |
| SSP3BG_SSP1Air-20  | 164.04                              | 2.29                              | As above - 20% aviation NOx emissions |
| REF_SSP3           | 164.04                              | 5.80                              | SSP3 baseline                         |
| SSP3_Air-20        | 164.04                              | 4.64                              | SSP3 - 20% aviation NOx emissions     |
| REF_SSP1BG_SSP3Air | 71.61                               | 5.80                              | SSP3 baseline with SSP1 background    |
| SSP1BG_SSP3Air-20  | 71.61                               | 4.64                              | As above – 20% aviation NOx emissions |

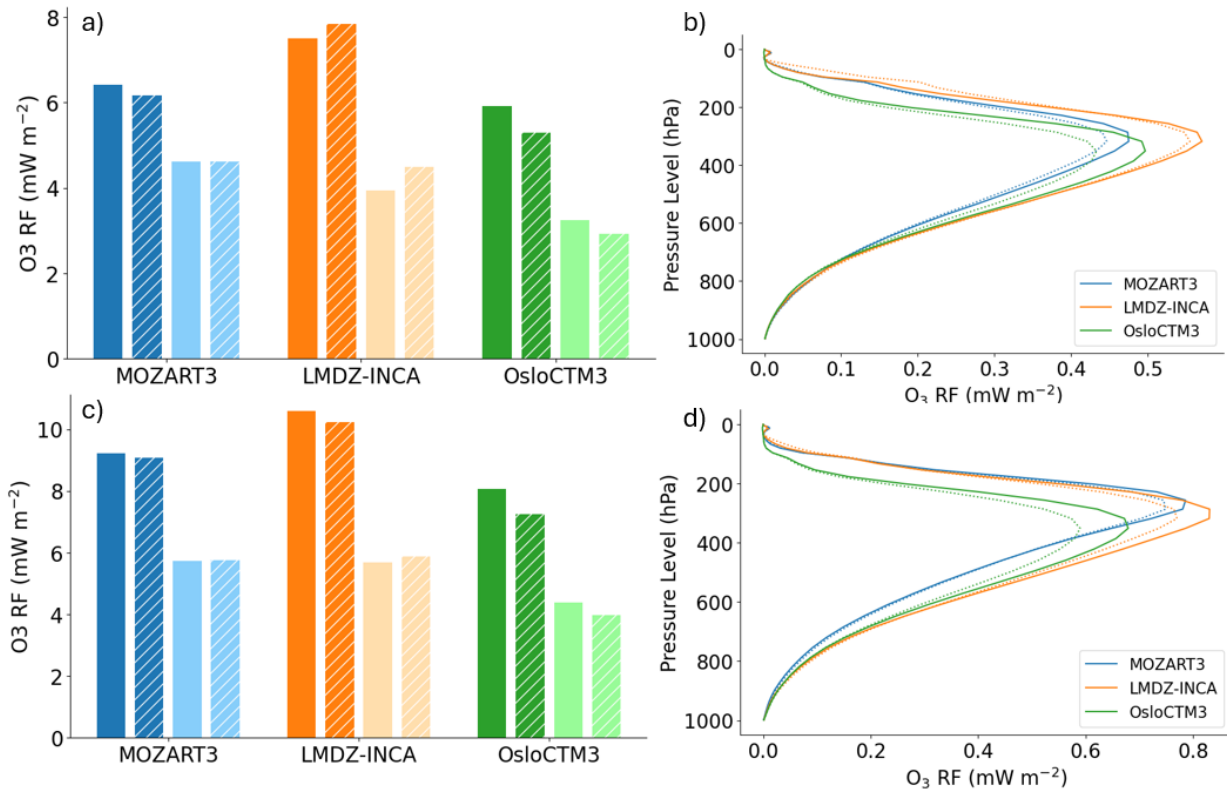

**Fig S1: Short-term ozone radiative forcing for a 20% reduction in aviation emissions for SSP3 and SSP1 (darker and lighter colours respectively) with varying background emissions (SSP3 solid and SSP1 hatched) for different months. January: (a) monthly mean ozone RF global sum, (b) vertical profile of difference in ozone RF in SSP1 background compared to SSP3 background for SSP3 emissions. (c) and (d) and the equivalent for May.**

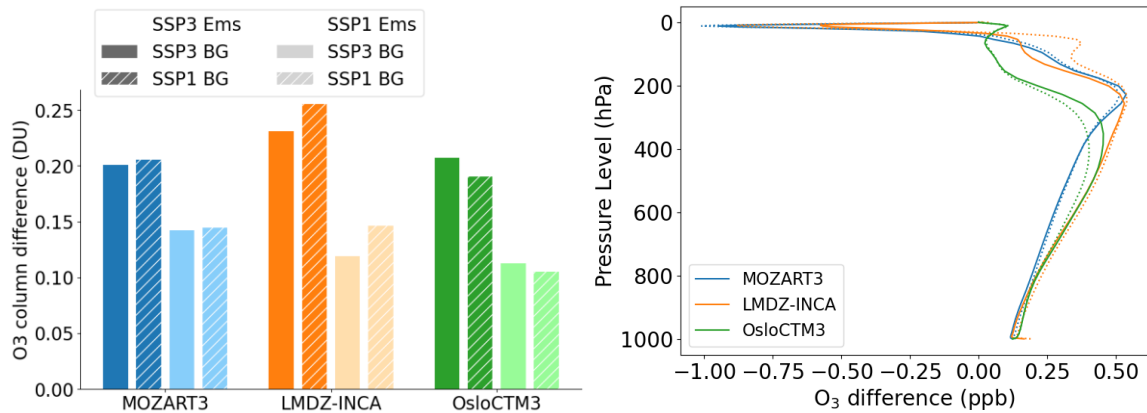

**Fig S2: Change in ozone mixing ratio for a 20% reduction in aviation NO<sub>x</sub> emissions a) ozone column difference in DU, b) vertical ozone mixing ratio distribution in SSP3 emissions scenario, SSP1 background shown in dashed lines.**

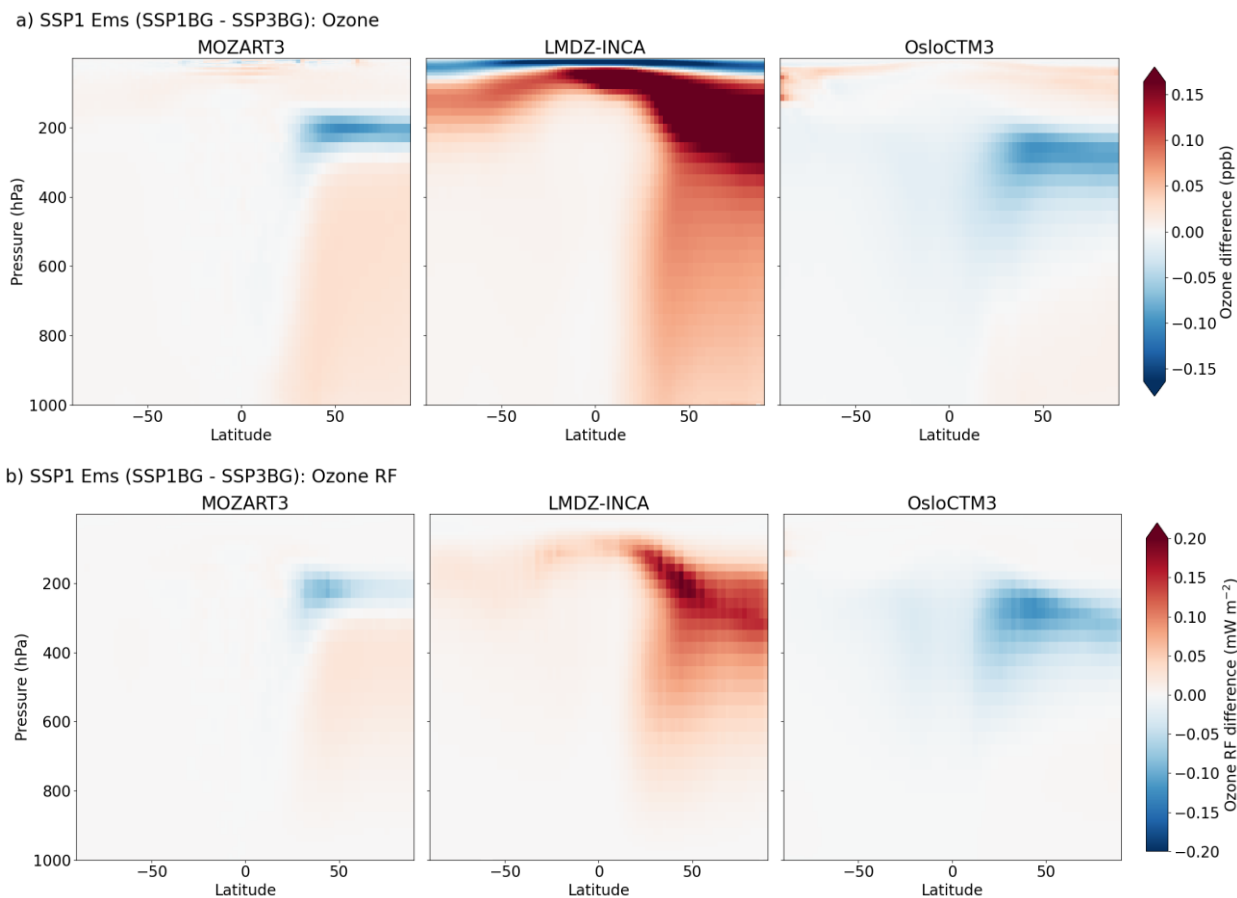

**Fig S3: Difference between (a) ozone mixing ratio and (b) ozone RF for a 20% reduction in aircraft NO<sub>x</sub> emissions, in SSP1 and SSP3 backgrounds. Positive means that there is greater ozone reduction in SSP1 than in SSP3 background. As Fig 4 but for the SSP1 emissions experiments.**

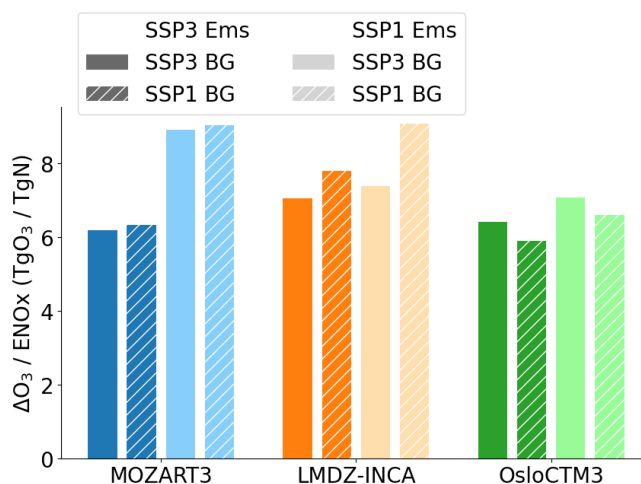

**Fig S4: Ozone sensitivity to NO<sub>x</sub> emissions (change in burden / change in NO<sub>x</sub> emissions, TgO<sub>3</sub> / (TgN yr<sup>-1</sup>)).**

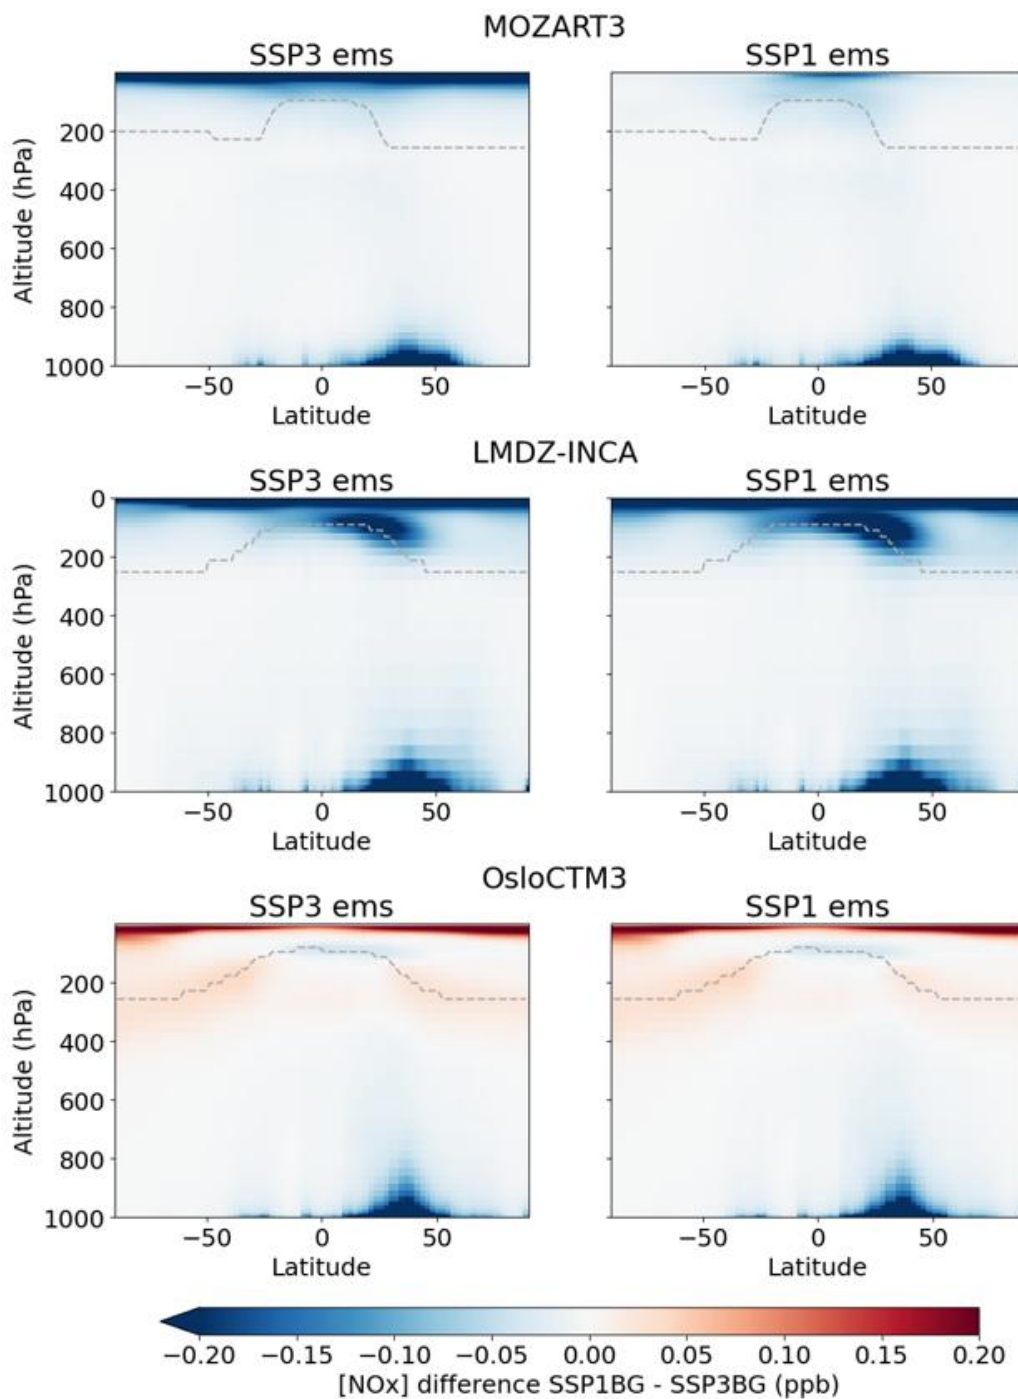

Fig S5: NO<sub>x</sub> (NO<sub>2</sub> + NO) concentration differences between SSP3 and SSP1 background scenarios (SSP1 - SSP3), for SSP3 aviation emissions (left) and SSP1 aviation emissions (right). Blue colour corresponds to lower concentration in SSP1.

**Table S2: Net NOx component radiative forcing (data for bar chart in Fig 5). All units are mW m<sup>-2</sup>. Bold numbers in net NOx column show multi-model mean.**

|                       | <b>Short-term O<sub>3</sub></b> | <b>CH<sub>4</sub></b> | <b>Long-term O<sub>3</sub></b> | <b>Strat. H<sub>2</sub>O</b> | <b>Net NOx RF</b> |
|-----------------------|---------------------------------|-----------------------|--------------------------------|------------------------------|-------------------|
| <b>SSP3BG_SSP3AIR</b> |                                 |                       |                                |                              |                   |
| LMDZ-INCA             | 45.15                           | -25.01                | -12.13                         | -3.93                        | 4.08              |
| MOZART3               | 41.38                           | -18.77                | -9.10                          | -2.95                        | 10.56             |
| OsloCTM3              | 37.45                           | -19.50                | -9.46                          | -3.06                        | 5.44              |
|                       |                                 |                       |                                |                              | <b>6.70</b>       |
| <b>SSP3BG_SSP1AIR</b> |                                 |                       |                                |                              |                   |
| LMDZ-INCA             | 23.20                           | -15.51                | -7.52                          | -2.43                        | -2.27             |
| MOZART3               | 27.17                           | -12.25                | -5.94                          | -1.92                        | 7.053             |
| OsloCTM3              | 20.33                           | -12.26                | -5.95                          | -1.92                        | 0.20              |
|                       |                                 |                       |                                |                              | <b>1.66</b>       |
| <b>SSP1BG_SSP3AIR</b> |                                 |                       |                                |                              |                   |
| LMDZ-INCA             | 48.30                           | -31.53                | -11.60                         | -3.75                        | 1.42              |
| MOZART3               | 41.27                           | -21.96                | -8.08                          | -2.62                        | 8.62              |
| OsloCTM3              | 33.50                           | -21.88                | -8.05                          | -2.60                        | 0.97              |
|                       |                                 |                       |                                |                              | <b>3.67</b>       |
| <b>SSP1BG_SSP1AIR</b> |                                 |                       |                                |                              |                   |
| LMDZ-INCA             | 27.40                           | -21.01                | -7.73                          | -2.50                        | -3.84             |
| MOZART3               | 27.17                           | -14.50                | -5.34                          | -1.73                        | 5.60              |
| OsloCTM3              | 18.36                           | -13.94                | -5.13                          | -1.66                        | -2.38             |
|                       |                                 |                       |                                |                              | <b>-0.21</b>      |

**Table S3: Net NO<sub>x</sub> component effective radiative forcing (ERF). All units are mW m<sup>-2</sup>. Bold numbers in net NO<sub>x</sub> column show multi-model mean. These are calculated from the RFs in Table S1 using ERF/RF ratios from Lee et al. (2021) (see caveats therein). The present-day ERF values are from Cohen et al. (2025b).**

|                       | Short-term O <sub>3</sub> | CH <sub>4</sub> | Long-term O <sub>3</sub> | Strat. H <sub>2</sub> O | Net NO <sub>x</sub> ERF |
|-----------------------|---------------------------|-----------------|--------------------------|-------------------------|-------------------------|
| <b>SSP3BG_SSP3AIR</b> |                           |                 |                          |                         |                         |
| LMDZ-INCA             | 61.86                     | -29.51          | -14.32                   | -4.63                   | 13.40                   |
| MOZART3               | 56.68                     | -22.14          | -10.74                   | -3.48                   | 20.32                   |
| OsloCTM3              | 51.31                     | -23.01          | -11.16                   | -3.61                   | 13.53                   |
|                       |                           |                 |                          |                         | <b>15.75</b>            |
| <b>SSP3BG_SSP1AIR</b> |                           |                 |                          |                         |                         |
| LMDZ-INCA             | 31.78                     | -18.30          | -8.88                    | -2.87                   | 1.73                    |
| MOZART3               | 37.22                     | -14.45          | -7.01                    | -2.27                   | 13.48                   |
| OsloCTM3              | 27.85                     | -14.46          | -7.02                    | -2.27                   | 4.10                    |
|                       |                           |                 |                          |                         | <b>6.44</b>             |
| <b>SSP1BG_SSP3AIR</b> |                           |                 |                          |                         |                         |
| LMDZ-INCA             | 66.17                     | -37.20          | -13.69                   | -4.43                   | 10.85                   |
| MOZART3               | 56.55                     | -25.92          | -9.54                    | -3.09                   | 18.01                   |
| OsloCTM3              | 45.90                     | -25.81          | -9.50                    | -3.07                   | 7.51                    |
|                       |                           |                 |                          |                         | <b>12.12</b>            |
| <b>SSP1BG_SSP1AIR</b> |                           |                 |                          |                         |                         |
| LMDZ-INCA             | 37.54                     | -24.79          | -9.12                    | -2.95                   | 0.67                    |
| MOZART3               | 37.22                     | -17.11          | -6.30                    | -2.04                   | 11.78                   |
| OsloCTM3              | 25.15                     | -16.45          | -6.05                    | -1.96                   | 0.68                    |
|                       |                           |                 |                          |                         | <b>4.38</b>             |
| <b>PRESENT DAY</b>    |                           |                 |                          |                         |                         |
| LMDZ-INCA             | 43.0                      | -15.4           | -6.24                    | -2.02                   | 19.4                    |
| MOZART3               | 42.2                      | -11.5           | -4.68                    | -1.51                   | 24.5                    |
| OsloCTM3              | 33.8                      | -11.6           | -4.73                    | -1.53                   | 15.9                    |
|                       |                           |                 |                          |                         | <b>19.93</b>            |

**Table S4: Details for the inferred methane perturbations and RF calculated from the modelled methane lifetime change ( $\Delta\tau_{\text{CH}_4}$ ) from the 20% perturbation (reduction) in aviation NOx. Calculated based on the method described in the main text based on Equations 1 and 2.**

|                       | $[\text{CH}_4]_{\text{REF}}$<br>(ppbv) | $\Delta\tau_{\text{CH}_4}$<br>(%) | $\Delta\text{CH}_4$<br>(ppbv) | $[\text{CH}_4]_{\text{PERT}}$<br>(ppbv) | $\text{RF}_{\text{CH}_4}$<br>( $\text{mW m}^{-2}$ ) |
|-----------------------|----------------------------------------|-----------------------------------|-------------------------------|-----------------------------------------|-----------------------------------------------------|
| <b>SSP3BG_SSP3AIR</b> |                                        |                                   |                               |                                         |                                                     |
| LMDZ-INCA             | 2472                                   | -2.354                            | -67                           | 2405                                    | -25.01                                              |
| MOZART3               | 2472                                   | -1.767                            | -51                           | 2421                                    | -18.77                                              |
| OsloCTM3              | 2472                                   | -1.812                            | -53                           | 2419                                    | -19.50                                              |
| <b>SSP3BG_SSP1AIR</b> |                                        |                                   |                               |                                         |                                                     |
| LMDZ-INCA             | 2472                                   | -1.239                            | -42                           | 2430                                    | -15.51                                              |
| MOZART3               | 2472                                   | -0.980                            | -33                           | 2439                                    | -12.25                                              |
| OsloCTM3              | 2472                                   | -0.969                            | -33                           | 2429                                    | -12.26                                              |
| <b>SSP1BG_SSP3AIR</b> |                                        |                                   |                               |                                         |                                                     |
| LMDZ-INCA             | 1519                                   | -3.627                            | -64                           | 1455                                    | -31.53                                              |
| MOZART3               | 1519                                   | -2.536                            | -45                           | 1474                                    | -21.96                                              |
| OsloCTM3              | 1519                                   | -2.490                            | -45                           | 1474                                    | -21.88                                              |
| <b>SSP1BG_SSP1AIR</b> |                                        |                                   |                               |                                         |                                                     |
| LMDZ-INCA             | 1519                                   | -2.060                            | -43                           | 1476                                    | -21.01                                              |
| MOZART3               | 1519                                   | -1.426                            | -30                           | 1489                                    | -14.50                                              |
| OsloCTM3              | 1519                                   | -1.351                            | -29                           | 1490                                    | -13.94                                              |
